# Supplementary material for: A Gβ protein and the TupA Co-Regulator Bind to Protein Kinase A Tpk2 to Act as Antagonistic Molecular Switches of Fungal Morphological Changes
Source: PLOS journal article supplement (doi:10.1371/journal.pone.0136866), 2015-09-03
Supplement: S8 (10.1371/journal.pone.0136866.s008) [file journal.pone.0136866.s008]

**S4 Fig. PbGpa1 does not block pseudohyphae formation. (A)** *P. brasiliensis* *GPA1-GFP* was transformed with or without *PbTPK2* into the *S. cerevisiae* MLY61a $\alpha$  (WT) and the *TPK2* $\Delta$  mutant XPY5a/ $\alpha$  (XPY) and then the transformants were streaked on SLAD agar and an individual colony was observed under 20x magnification. The XPY5a/ $\alpha$ /*PbGPA1* transformant was unable to produce pseudohyphae but the MLY61a/ $\alpha$ /*PbGPA1* transformant and the XPY5a/ $\alpha$ /*PbTPK2*/*PbGPA1* co-transformant could both produce pseudohyphae in response to a limited nitrogen supply. PbGpa1 does not block bind Tpk2 to block pseudohyphae formation. **(B)** **Pan-cellular distribution of PbGpa1 in *S. cerevisiae* cells.** Confocal microscopy of cells expressing PbGpa1-GFP, in which the nucleus was localized by staining with DAPI.

**A**

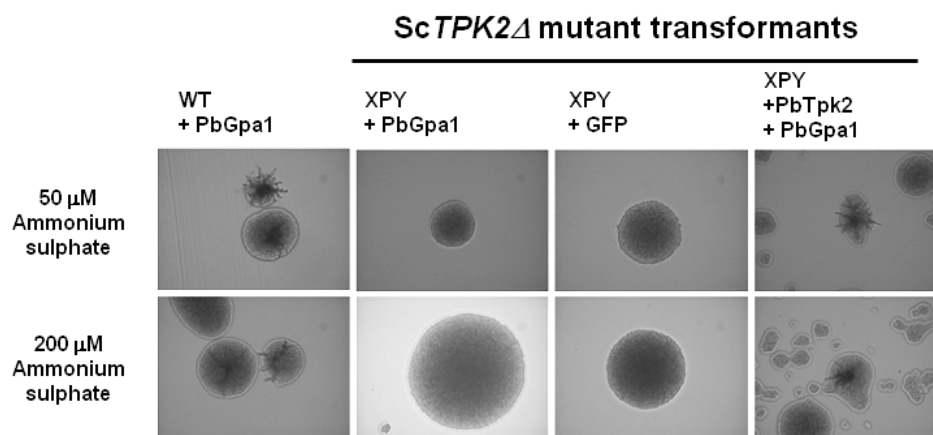

**B**

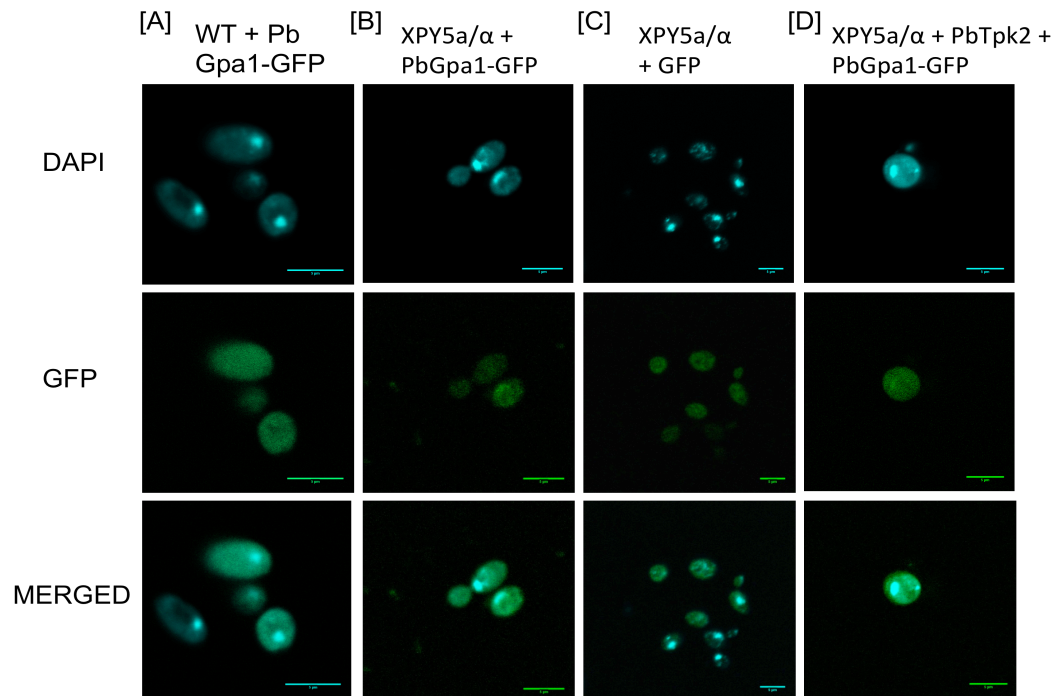

Scale Bar: 5 $\mu$ m
