# Supplementary material for: A Gβ protein and the TupA Co-Regulator Bind to Protein Kinase A Tpk2 to Act as Antagonistic Molecular Switches of Fungal Morphological Changes
Source: PLOS journal article supplement (doi:10.1371/journal.pone.0136866), 2015-09-03

**S7 Fig. PbTupA is localized in the nucleus.** *P. brasiliensis* *TUPA-mRFP* was transformed into the *S. cerevisiae* MLY61a/ $\alpha$  (WT) diploid strain and its *TPK2A* mutant XPY5a/ $\alpha$  and then the transformants were streaked on SLAD agar and an individual colony was observed under 20x magnification. Confocal microscopy of cells expressing PbTupA-mRFP, in which the nucleus was localized by staining with DAPI.

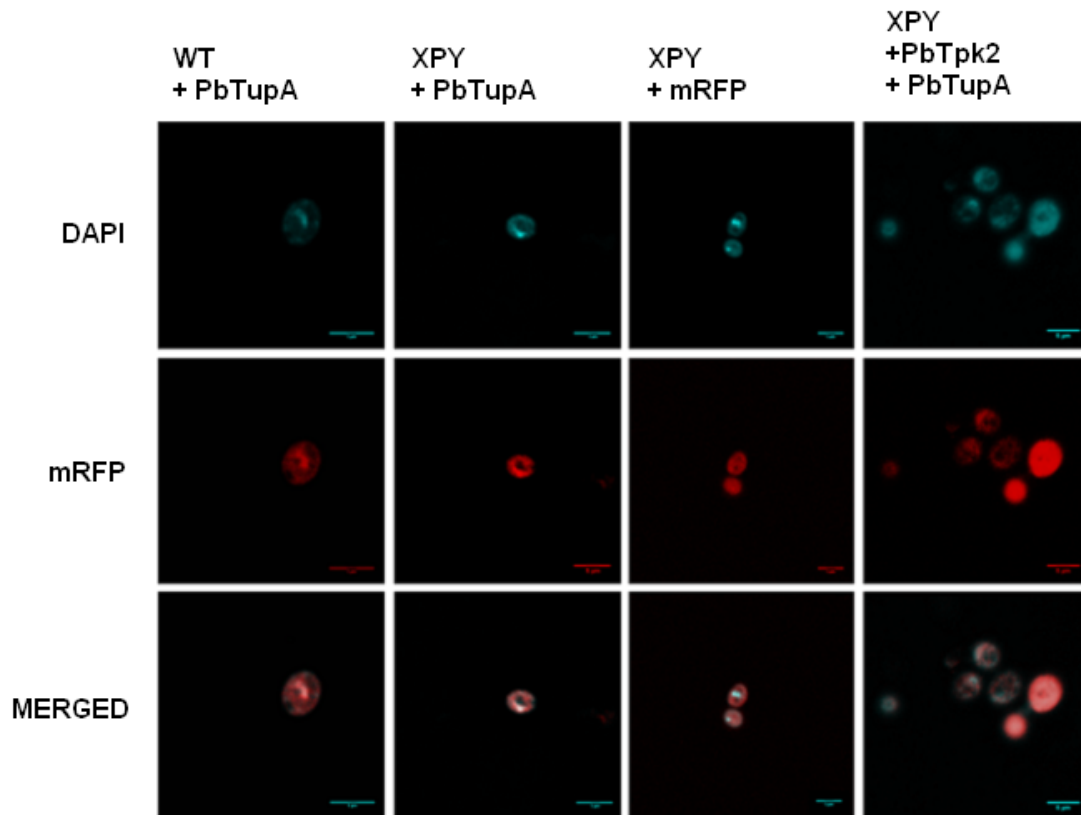

Supplement: S11 (10.1371/journal.pone.0136866.s011) [file journal.pone.0136866.s011]
